# Supplementary material for: The Impact of Temperature on the Sporogonic Development of the Tropical Avian Malaria Parasite Plasmodium relictum (Genetic Lineage pGRW4) in Culex pipiens Form molestus Mosquitoes
Source: MDPI journal article supplement (doi:10.3390/microorganisms9112240), 2021-10-28
Supplement: s1 [file s1]

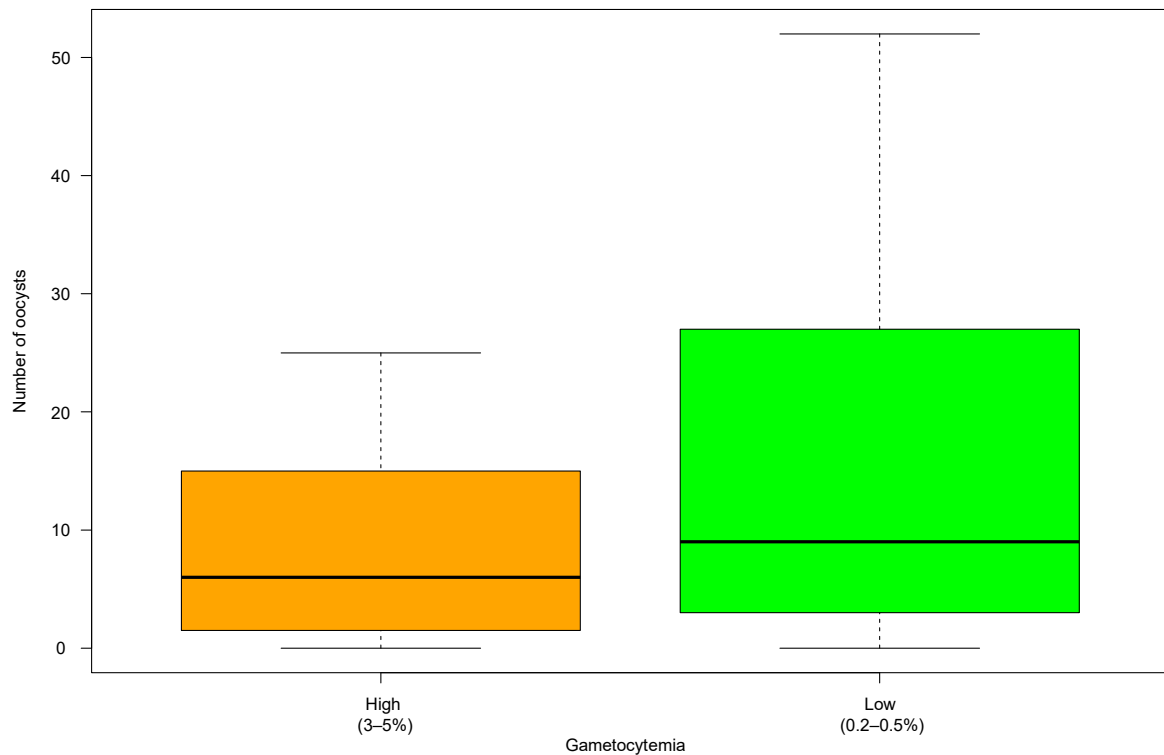

**Figure S1:** The difference between *Plasmodium relictum* (pGRW4) oocyst numbers in *Culex pipiens form molestus* exposed to high and low intensity of gametocytaemia.

**Table S1.** Dissection of experimental *Culex pipiens form molestus* mosquitoes exposed to avian malaria parasite *Plasmodium relictum* (genetic lineage pGRW4).

| Number of oocysts | Presence of sporozoites | Days post exposure | Intensity of gametocytaemia | Experimental group | Mortality |
|-------------------|-------------------------|--------------------|-----------------------------|--------------------|-----------|
| N/A               | N/A                     | 2                  | Low                         | E1                 | Dead      |
| N/A               | N/A                     | 4                  | Low                         | E1                 | Dead      |
| 13                | N/A                     | 6                  | High                        | E1                 |           |
| 7                 | N/A                     | 6                  | High                        | E1                 |           |
| 23                | N/A                     | 8                  | High                        | E1                 |           |
| N/A               | N/A                     | 8                  | High                        | E1                 | Dead      |
| 13                | N/A                     | 9                  | High                        | E1                 | Dead      |
| 44                | N/A                     | 10                 | Low                         | E1                 |           |
| 15                | N/A                     | 10                 | High                        | E1                 |           |
| 15                | N/A                     | 12                 | High                        | E1                 |           |
| N/A               | N/A                     | 13                 | High                        | E1                 | Dead      |
| N/A               | N/A                     | 14                 | High                        | E1                 | Dead      |
| 4                 | Positive                | 14                 | Low                         | E1                 |           |
| 136               | Negative                | 14                 | High                        | E1                 |           |

|     |          |    |      |    |      |
|-----|----------|----|------|----|------|
| N/A | N/A      | 15 | High | E1 | Dead |
| 36  | Positive | 16 | High | E1 |      |
| 10  | Negative | 17 | High | E1 | Dead |
| 9   | Positive | 18 | Low  | E1 |      |
| 24  | Positive | 18 | High | E1 |      |
| 1   | Positive | 19 | Low  | E1 |      |
| 11  | Positive | 20 | Low  | E1 |      |
| 1   | Positive | 20 | High | E1 |      |
| 2   | Positive | 22 | Low  | E1 |      |
| 2   | Positive | 22 | High | E1 |      |
| 2   | Positive | 22 | Low  | E1 |      |
| 14  | Positive | 24 | High | E1 |      |
| 1   | Positive | 24 | Low  | E1 |      |
| 7   | Positive | 26 | Low  | E1 |      |
| 9   | Positive | 26 | Low  | E1 |      |
| 0   | Positive | 28 | Low  | E1 |      |
| N/A | N/A      | 1  | High | E2 | Dead |
| N/A | N/A      | 2  | High | E2 |      |
| N/A | N/A      | 2  | Low  | E2 |      |
| N/A | N/A      | 2  | Low  | E2 | Dead |
| 4   | N/A      | 6  | High | E2 |      |
| 52  | N/A      | 6  | Low  | E2 |      |
| 40  | N/A      | 7  | Low  | E2 | Dead |
| N/A | N/A      | 8  | High | E2 | Dead |
| 4   | N/A      | 8  | High | E2 |      |
| 5   | N/A      | 8  | Low  | E2 |      |
| N/A | N/A      | 9  | High | E2 | Dead |
| 6   | N/A      | 10 | High | E2 |      |
| N/A | N/A      | 10 | Low  | E2 | Dead |
| 16  | N/A      | 10 | Low  | E2 | Dead |
| 30  | N/A      | 10 | Low  | E2 |      |
| 7   | N/A      | 10 | High | E2 |      |
| 26  | N/A      | 10 | Low  | E2 |      |
| 0   | N/A      | 11 | High | E2 |      |
| 25  | N/A      | 12 | High | E2 |      |
| 27  | N/A      | 12 | Low  | E2 |      |
| 36  | N/A      | 12 | High | E2 |      |
| 80  | N/A      | 12 | Low  | E2 |      |
| N/A | N/A      | 13 | Low  | E2 | Dead |
| 17  | Negative | 14 | High | E2 |      |
| 39  | Negative | 14 | High | E2 |      |
| 2   | Negative | 14 | Low  | E2 |      |
| 19  | Negative | 14 | Low  | E2 |      |
| N/A | N/A      | 15 | High | E2 | Dead |
| N/A | N/A      | 16 | High | E2 | Dead |

|     |          |    |      |    |      |
|-----|----------|----|------|----|------|
| N/A | N/A      | 16 | High | E2 | Dead |
| 25  | Negative | 16 | High | E2 |      |
| 3   | Positive | 16 | Low  | E2 |      |
| N/A | N/A      | 17 | Low  | E2 | Dead |
| N/A | N/A      | 17 | Low  | E2 | Dead |
| 9   | Positive | 18 | High | E2 |      |
| 1   | Positive | 18 | Low  | E2 |      |
| 2   | Positive | 20 | High | E2 |      |
| 10  | Positive | 20 | Low  | E2 |      |
| 10  | Positive | 20 | Low  | E2 |      |
| 27  | Negative | 20 | Low  | E2 |      |
| 13  | Positive | 22 | Low  | E2 |      |
| 9   | Positive | 22 | Low  | E2 |      |
| 0   | Positive | 22 | High | E2 |      |
| 10  | Positive | 24 | Low  | E2 |      |
| 6   | Positive | 24 | Low  | E2 |      |
| 7   | Positive | 24 | Low  | E2 |      |
| 2   | Positive | 24 | High | E2 |      |
| 7   | Positive | 24 | High | E2 |      |
| 0   | Positive | 26 | High | E2 |      |
| 14  | Positive | 26 | Low  | E2 |      |
| 5   | Positive | 26 | Low  | E2 |      |
| 0   | Positive | 28 | High | E2 |      |
| 1   | Positive | 28 | Low  | E2 |      |
| 0   | Positive | 28 | Low  | E2 |      |
| N/A | N/A      | 2  | High | E3 | Dead |
| N/A | N/A      | 4  | Low  | E3 | Dead |
| 0   | N/A      | 6  | High | E3 |      |
| 0   | N/A      | 6  | Low  | E3 |      |
| 7   | N/A      | 6  | Low  | E3 |      |
| 2   | N/A      | 7  | High | E3 |      |
| 3   | N/A      | 7  | Low  | E3 | Dead |
| 5   | N/A      | 7  | High | E3 |      |
| N/A | N/A      | 7  | Low  | E3 | Dead |
| N/A | N/A      | 7  | Low  | E3 | Dead |
| N/A | N/A      | 8  | High | E3 | Dead |
| 1   | N/A      | 8  | High | E3 |      |
| 2   | N/A      | 8  | High | E3 |      |
| 0   | N/A      | 8  | Low  | E3 |      |
| N/A | N/A      | 9  | High | E3 | Dead |
| 36  | N/A      | 10 | Low  | E3 |      |
| 0   | N/A      | 10 | High | E3 |      |
| 12  | N/A      | 10 | Low  | E3 |      |
| 17  | N/A      | 12 | High | E3 |      |
| 49  | N/A      | 12 | Low  | E3 |      |

|     |          |    |      |    |      |
|-----|----------|----|------|----|------|
| 6   | N/A      | 12 | Low  | E3 |      |
| 16  | N/A      | 12 | Low  | E3 |      |
| 2   | N/A      | 13 | Low  | E3 | Dead |
| 0   | Negative | 14 | High | E3 |      |
| 6   | Negative | 14 | High | E3 |      |
| 2   | Negative | 14 | High | E3 |      |
| 1   | Negative | 14 | High | E3 |      |
| 66  | Negative | 14 | Low  | E3 |      |
| 1   | Negative | 14 | Low  | E3 |      |
| 0   | Negative | 15 | High | E3 | Dead |
| 21  | Negative | 15 | High | E3 |      |
| 0   | Negative | 16 | High | E3 |      |
| 7   | Negative | 16 | Low  | E3 |      |
| 0   | Negative | 16 | High | E3 |      |
| N/A | Negative | 18 | Low  | E3 | Dead |
| 12  | Negative | 18 | High | E3 |      |
| 29  | Negative | 18 | Low  | E3 |      |
| 10  | Positive | 20 | High | E3 |      |
| 50  | Positive | 20 | Low  | E3 |      |
| 23  | Negative | 20 | High | E3 |      |
| 30  | Positive | 22 | Low  | E3 |      |
| 4   | Negative | 22 | High | E3 |      |
| 12  | Positive | 24 | Low  | E3 |      |
| 10  | Positive | 24 | High | E3 |      |
| 3   | Positive | 26 | High | E3 |      |
| 8   | Negative | 26 | Low  | E3 |      |
| N/A | N/A      | 27 | Low  | E3 | Dead |
| 12  | Negative | 28 | High | E3 |      |
